# Supplementary material for: Determination of trace fungicides in environmental water samples using poly(HPMA-EDMA) monolith microextraction coupled to high performance liquid chromatography
Source: Royal Society of Chemistry journal article supplement (doi:10.1039/c3ay00005b), 2014-01-01
Supplement: c3ay00005b1.pdf [file c3ay00005b1.pdf]

Electronic Supplementary Data

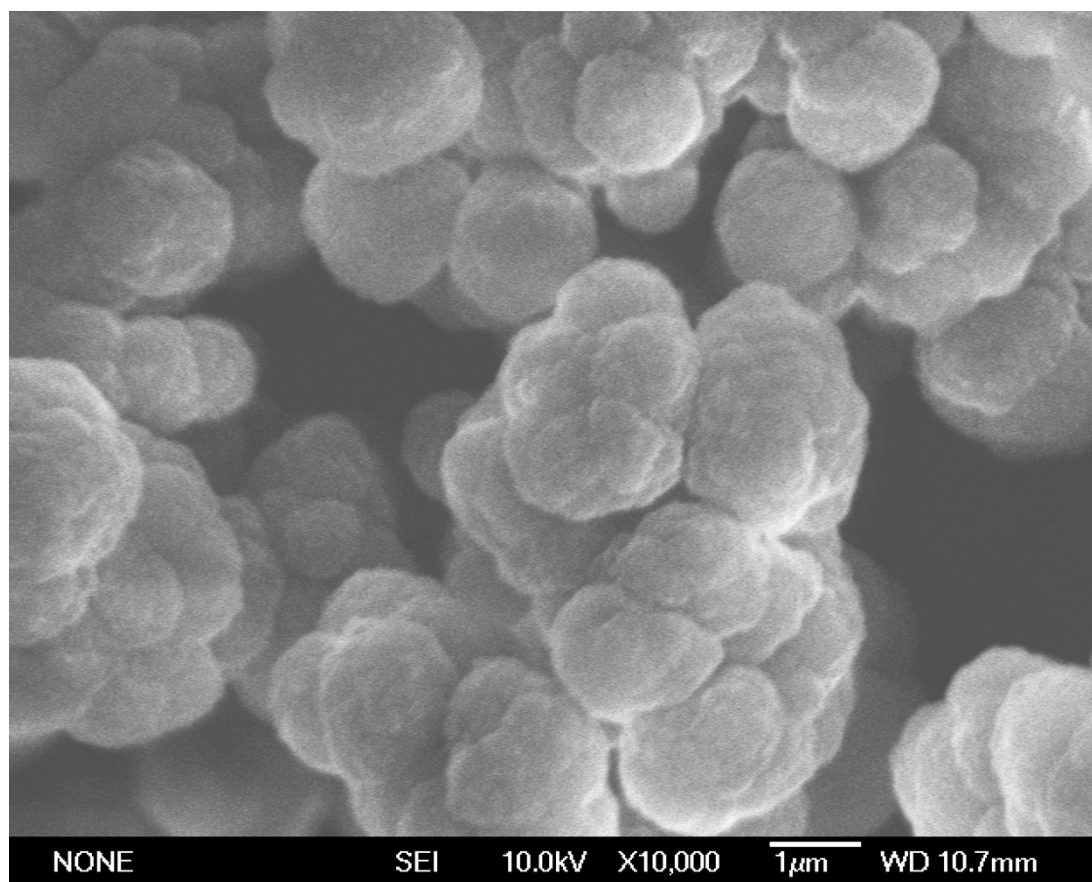

Figure S1

| Experiment condition              | Times |
|-----------------------------------|-------|
| Sample flow rate                  | 15    |
| Sample pH                         | 15    |
| Effect of desorption solvent type | 15    |
| Eluent volume                     | 15    |
| Eluent flow rate                  | 15    |
| Sample volume                     | 15    |
| Salt effect                       | 15    |
| Stability of the column           | 15    |
| Calibration curves                | 24    |
| Repeatability                     | 36    |
| Recovery                          | 36    |

Table S1
